# Supplementary material
Source: PubMed Central journal article supplement (PMC3916642)
Supplement: supp_M113.035600_mcp.M113.035600-1.pdf [file supp_M113.035600_mcp.M113.035600-1.pdf]

## **Supplementary Figures**

**Supplementary Figure 1.** Correlation scatter plots.

**Supplementary Figure 2.** Functional analysis of non-detected genes.

## **Supplementary Tables**

**Supplementary Table 1.** List of all included tissues and the average Spearman correlation of the gene expression (FPKM) between samples from the same tissue.

**Supplementary Table 2.** The definition of the gene expression based categories.

**Supplementary Table 3.** The number of tissue-specific genes in the analyzed tissues and organs.

**Supplementary Table 4.** Some examples of identified genes with a tissue-enriched expression pattern.

**Supplementary Data set 1.** Spreadsheet with the classification of each gene and the average FPKM values for all 27 tissues.

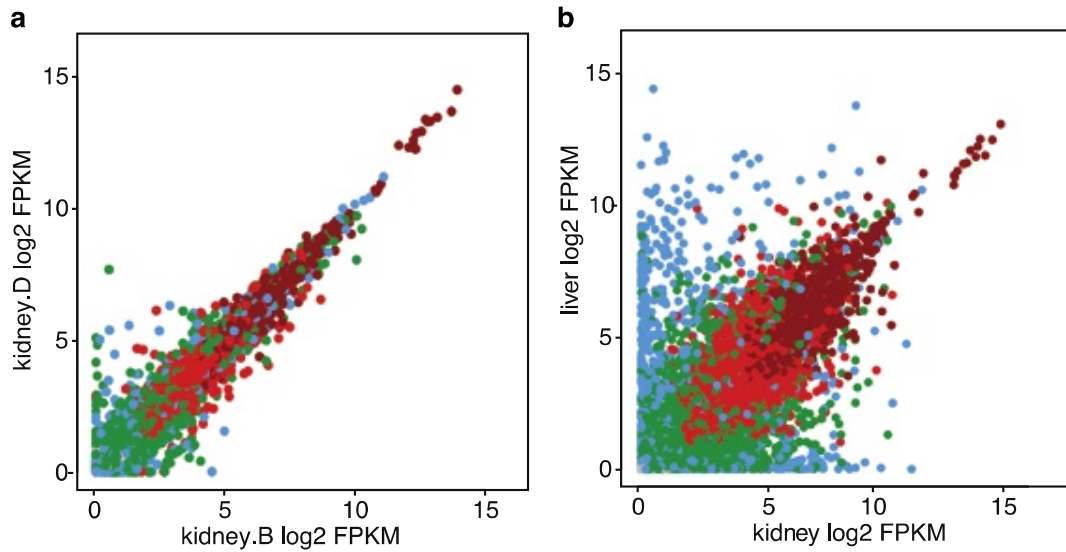

**Supplementary Figure 1. Correlation scatter plots.** **a)** Scatter plot of FPKM values for all detected genes in two kidney samples from different individuals. The pairwise Spearman correlation coefficient between the samples is 0.98.. Colors represent five categories: not detected (grey), tissue specific, tissue enriched or group enriched (blue), mixed low and high (green), expressed in all low (red), expressed in all high (dark red). **b)** Scatter plot of average FPKM values for all detected genes in four kidney samples (x-axis) and three liver samples (y-axis) from different individuals. The pairwise Spearman correlation coefficient between the two tissues is 0.86 and the colors represent the same categories as in (a).

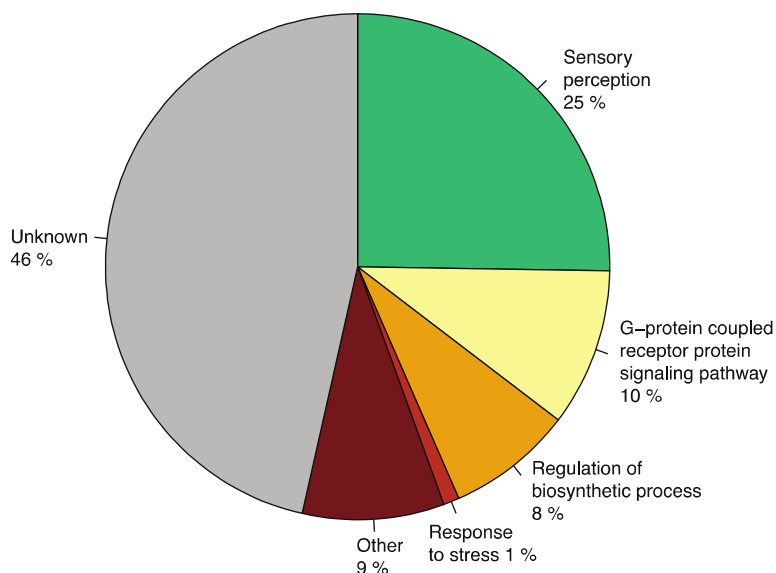

**Supplementary Figure 2. Functional analysis of non-detected genes.** Pie chart showing overrepresented biological process Gene Ontology terms for genes that were not detected in any tissue. The category “unknown” refers to genes with no associated terms.

## Supplementary Tables

**Supplementary Table 1.** List of all included tissues and the average Spearman correlation of the gene expression (FPKM) between samples from the same tissue.

| <b>Tissue</b>   | <b>No of samples</b> | <b>Average correlation coefficient (%)</b> |
|-----------------|----------------------|--------------------------------------------|
| salivary gland  | 3                    | 96.4                                       |
| lung            | 5                    | 96.5                                       |
| lymph node      | 5                    | 96.2                                       |
| liver           | 3                    | 96.6                                       |
| adrenal gland   | 3                    | 97.7                                       |
| duodenum        | 2                    | 97.8                                       |
| kidney          | 4                    | 96.9                                       |
| gallbladder     | 3                    | 96.2                                       |
| colon           | 5                    | 96.2                                       |
| small intestine | 4                    | 97.4                                       |
| appendix        | 3                    | 96.6                                       |
| prostate        | 4                    | 95.7                                       |
| testis          | 7                    | 96.3                                       |
| cerebral cortex | 3                    | 94.9                                       |
| thyroid gland   | 4                    | 96.0                                       |
| heart muscle    | 4                    | 96.1                                       |
| esophagus       | 3                    | 95.8                                       |
| spleen          | 4                    | 97.9                                       |
| stomach         | 3                    | 94.4                                       |
| pancreas        | 2                    | 96.8                                       |
| placenta        | 4                    | 96.5                                       |
| ovary           | 2                    | 97.6                                       |
| bone marrow     | 4                    | 95.8                                       |
| uterus          | 3                    | 94.8                                       |
| urinary bladder | 2                    | 95.2                                       |
| adipose tissue  | 3                    | 97.2                                       |
| skin            | 3                    | 96.1                                       |

**Supplementary Table 2.** The definition of the gene expression based categories.

| <b>Class</b>     | <b>Category</b>            | <b>Definition</b>                                                                        |
|------------------|----------------------------|------------------------------------------------------------------------------------------|
| Expressed in all | Expressed in all high      | Detected in 27 tissues and all tissues >10 FPKM                                          |
|                  | Expressed in all low       | Detected in 27 tissues and at least one tissue < 10 FPKM                                 |
| Mixed            | Mixed high                 | Detected in 1-26 tissues and all detected tissues > 10 FPKM                              |
|                  | Mixed low                  | Detected in 1-26 tissues and at least one tissue < 10 FPKM                               |
|                  | Highly tissue enriched     | 50-fold higher FPKM level in one tissue compared to all other tissues                    |
| Tissue specific  | Moderately tissue enriched | 5-fold higher FPKM level in one tissue compared to all other tissues                     |
|                  | Group enriched             | 5-fold higher average FPKM level in a group of 2-7 tissues compared to all other tissues |
| Not detected     | Not detected               | < 1 FPKM in all 27 tissues                                                               |

**Supplementary table 3.** The number of genes in each tissue specific category and total number of tissue specific genes for each tissue.

| <b>Tissue</b>   | <b>Highly tissue enriched</b> | <b>Moderately tissue enriched</b> | <b>Group enriched</b> | <b>Total tissue specific</b> |
|-----------------|-------------------------------|-----------------------------------|-----------------------|------------------------------|
| testis          | 364                           | 760                               | 254                   | 1378                         |
| cerebral cortex | 20                            | 316                               | 253                   | 589                          |
| liver           | 69                            | 110                               | 164                   | 343                          |
| skin            | 34                            | 72                                | 149                   | 255                          |
| esophagus       | 18                            | 43                                | 172                   | 233                          |
| kidney          | 20                            | 44                                | 156                   | 220                          |
| small intestine | 2                             | 2                                 | 193                   | 197                          |
| duodenum        | 0                             | 7                                 | 190                   | 197                          |
| heart muscle    | 17                            | 84                                | 80                    | 181                          |
| placenta        | 26                            | 59                                | 76                    | 161                          |
| bone marrow     | 20                            | 68                                | 57                    | 145                          |
| adrenal         | 5                             | 35                                | 94                    | 134                          |
| colon           | 1                             | 12                                | 118                   | 131                          |
| lung            | 6                             | 14                                | 96                    | 116                          |
| prostate        | 6                             | 16                                | 85                    | 107                          |
| salivary gland  | 24                            | 23                                | 58                    | 105                          |
| stomach         | 5                             | 22                                | 76                    | 103                          |
| pancreas        | 27                            | 20                                | 45                    | 92                           |
| adipose tissue  | 3                             | 29                                | 57                    | 89                           |
| thyroid         | 2                             | 25                                | 52                    | 79                           |
| gallbladder     | 0                             | 7                                 | 63                    | 70                           |
| spleen          | 0                             | 6                                 | 58                    | 64                           |
| uterus          | 1                             | 11                                | 49                    | 61                           |
| appendix        | 0                             | 2                                 | 56                    | 58                           |
| urinary bladder | 0                             | 2                                 | 48                    | 50                           |
| lymph node      | 0                             | 5                                 | 44                    | 49                           |
| ovary           | 0                             | 10                                | 33                    | 43                           |
| <b>Total</b>    | <b>670</b>                    | <b>1802</b>                       | <b>1027</b>           | <b>3499</b>                  |

**Supplementary Table 3. Examples of tissue-specific proteins.** The tissue-specific score (TS-score) is the ratio of the FPKM value in the given tissue and the maximal FPKM value in any of all the other tissues analyzed in this study.

| Gene     | Description                                   | Tissue          | TS-score | FPKM   |
|----------|-----------------------------------------------|-----------------|----------|--------|
| CTRB2    | chymotrypsinogen                              | pancreas        | 658      | 51 697 |
| AMY2A    | amylase                                       | pancreas        | 534      | 55 124 |
| INS      | insulin                                       | pancreas        | 123      | 2 178  |
| PNLIP    | lipase                                        | pancreas        | 116      | 31 024 |
| OPALIN   | oligodendrocytic myelin protein               | cerebral cortex | 525      | 53     |
| GFAP     | glial fibrillary acidic protein               | cerebral cortex | 394      | 1 409  |
| OLIG2    | oligodendrocyte transcription factor          | cerebral cortex | 262      | 38     |
| TUSC5    | tumor suppressor candidate 5                  | adipose tissue  | 64       | 152    |
| ADIPOQ   | adiponectin, collagen domain containing       | adipose tissue  | 57       | 840    |
| LEP      | leptin                                        | adipose tissue  | 52       | 268    |
| MYBPC3   | myosin binding protein C, cardiac             | heart muscle    | 815      | 615    |
| TNNI3    | troponin I type 3 (cardiac)                   | heart muscle    | 334      | 2 105  |
| TNNT2    | troponin T type 2 (cardiac)                   | heart muscle    | 102      | 2 768  |
| UMOD     | uromodulin                                    | kidney          | 648      | 1 421  |
| SLC22A8  | organic anion transporter                     | kidney          | 633      | 269    |
| F2       | coagulation factor II (thrombin)              | liver           | 2 205    | 556    |
| APOA2    | apolipoprotein A-II                           | liver           | 1 523    | 5 762  |
| CYP2A6   | cytochrome P450, family                       | liver           | 545      | 674    |
| ADH1A    | alcohol dehydrogenase 1A                      | liver           | 119      | 748    |
| HP       | haptoglobin                                   | liver           | 106      | 26 593 |
| SFTPA1   | surfactant protein A1                         | lung            | 1 206    | 4 866  |
| SFTPB    | surfactant protein B                          | lung            | 726      | 2 744  |
| PSG2     | pregnancy specific beta-1-glycoprotein 2      | placenta        | 1 533    | 268    |
| CSHL1    | chorionic somatomammotropin hormone-like      | placenta        | 973      | 303    |
| PSG11    | pregnancy specific beta-1-glycoprotein 11     | placenta        | 800      | 80     |
| XAGE2    | X antigen family, member 2                    | placenta        | 72       | 90     |
| KLK3     | Prostate specific antigen                     | prostate        | 816      | 4 701  |
| TGM4     | transglutaminase 4 (prostate)                 | prostate        | 86       | 859    |
| ACPP     | acid phosphatase, prostate                    | prostate        | 52       | 1 942  |
| C4orf40  | chromosome 4 open reading frame 40            | salivary gland  | 960      | 1 439  |
| CST5     | cystatin D                                    | salivary gland  | 814      | 1 109  |
| MUC7     | mucin 7, secreted                             | salivary gland  | 713      | 6 786  |
| C1orf68  | chromosome 1 open reading frame 68            | skin            | 3 858    | 386    |
| LCE2B    | late cornified envelope 2B                    | skin            | 3 717    | 387    |
| KRT2     | keratin 2                                     | skin            | 1 060    | 1 193  |
| PGA3     | pepsinogen A                                  | stomach         | 1 578    | 37 916 |
| GIF      | gastric intrinsic factor                      | stomach         | 791      | 822    |
| BOD1L2   | biorientation of chromosomes in cell division | testis          | 4 049    | 405    |
| PRM2     | protamine 2                                   | testis          | 2 520    | 2 447  |
| SPATA8   | spermatogenesis associated 8                  | testis          | 1 288    | 250    |
| IQCF1    | IQ motif containing F1                        | testis          | 481      | 48     |
| 139D8.6  | No name (RP1-139D8.6)                         | testis          | 343      | 35     |
| C17orf74 | Chromosome 17 open reading frame 74           | testis          | 342      | 34     |
| TG       | thyroglobulin                                 | thyroid         | 497      | 3 256  |
| TSHR     | thyroid stimulating hormone receptor          | thyroid         | 158      | 323    |
| CRNN     | cornulin                                      | esophagus       | 627      | 2139   |
| MC2R     | melanocortin 2 receptor                       | adrenal         | 74       | 36     |
| DEFA4    | defensin, alpha 4, corticostatin              | bone marrow     | 405      | 1 599  |
| ELANE    | elastase, neutrophil expressed                | bone marrow     | 311      | 1 282  |
